# Supplementary material
Source: PubMed Central journal article supplement (PMC4479452)
Supplement: 40629_2014_22_MOESM1_ESM.pdf [file 40629_2014_22_MOESM1_ESM.pdf]

Schäfer T, Bauer CP, Beyer K, Bufe A, Friedrichs F, Gieler U, Gronke G, Hamelmann E, Hellermann M, Kleinheinz A, Klimek L, Koletzko S, Kopp MV, Lau S, Müssen H, Reese I, Schmidt S, Schnadt S, Sitter H, Strömer K, Vagts J, Vogelberg C, Wahn U, Werfel T, Worm M, Mücke-Borowski C. S3-Guideline on allergy prevention: 2014 update. Guideline of the German Society for Allergy and Clinical Immunology (DGAKI) and the German Society for Pediatric and Adolescent Medicine (DGKJ). **Allergo J Int** 2014;186–99

## Supplementary Material

### List of included studies

1. Ahmad N, Biswas S, Bae S, Meador KE, Huang R, Singh KP. Association between obesity and asthma in US children and adolescents. *J Asthma*. 2009; 46(7):642-646.
2. Alm B et al. Early introduction of fish decreases the risk of eczema in infants. *Arch Dis Child*. 2009; 94(1):11-5. doi: 10.1136/adc.2008.140418.
3. Anderson HR, Ruggles R, Pandey KD, Kapetanakis V, Brunekreef B, Lai CK, Strachan DP, Weiland SK; ISAAC Phase One Study Group. Ambient particulate pollution and the worldwide prevalence of asthma, rhinoconjunctivitis and eczema in children: Phase One of the International Study of Asthma and Allergies in Childhood (ISAAC). *Occup Environ Med*. 2010; 67(5):293-300. doi: 10.1136/oem.2009.048785.
4. Arslanoglu S, Moro GE, Schmitt J, Tandoi L, Rizzardi S, Boehm G. Early Dietary Intervention with a Mixture of Prebiotic Oligosaccharides Reduces the Incidence of Allergic Manifestations and Infections during the First Two Years of Life. *J. Nutr*. 2008; 138: 1091–1095.
5. Arvaniti F, Priftis KN, Papadimitriou A, Yiallourous P, Kapsokafalou M, Anthracopoulos MB, Panagiotakos DB. Salty-snack eating, television or video-game viewing, and asthma symptoms among 10- to 12-year-old children: the PANACEA study. *J Am Diet Assoc*. 2011; 111(2):251-7. doi: 10.1016/j.jada.2010.10.051.
6. Arvaniti F, Priftis KN, Papadimitriou A, Papadopoulos M, Roma E, Kapsokafalou M, Anthracopoulos MB, Panagiotakos DB. Adherence to the Mediterranean type of diet is associated with lower prevalence of asthma symptoms, among 10–12 years old children: the PANACEA study. *Pediatric Allergy and Immunology* 2011; 22(3):283-9. Doi no: 10.1111/j.1399-3038.2010.01113.x
7. Back O, Blomquist HK, Hernell O, Stenberg B. Does vitamin D intake during infancy promote the development of atopic allergy? *Acta Derm.Venereol*.2009; 89, 28–32.
8. Beasley RW, Clayton TO, Crane J, Lai CK, Montefort SR, Mutius Ev, Stewart AW; ISAAC Phase Three Study Group. Acetaminophen use and risk of asthma, rhinoconjunctivitis, and eczema in adolescents: International Study of Asthma and Allergies in Childhood Phase Three. *Am J Respir Crit Care Med*. 2011; 183(2):171-8. doi: 10.1164/rccm.201005-0757OC.
9. Benet M, Varraso R, Kauffmann F, Romieu I, Anto JM, et al. The effects of regular physical activity on adult-onset asthma incidence in women. *Respir Med* 2011; 105: 1104–1107.

10. Bertelsen RJ, Brantsæter AL, Magnus MC, Haugen M, Myhre R, Jacobsson B, Longnecker MP, Meltzer HM, London SJ. Probiotic milk consumption in pregnancy and infancy and subsequent childhood allergic diseases. *J Allergy Clin Immunol* 2013;in press.
11. Birch EE, Khoury JC, Berseth CL, Castaneda YS, Couch JM, Bean J, Tamer R, Harris CL, Mitmesser SH, and Scalabrin DM. The Impact of Early Nutrition on Incidence of Allergic Manifestations and Common Respiratory Illnesses in Children. *J Pediatr* 2010; 156:902-6.
12. Björkstén B, Ait-Khaled N, Innes Asher N, Clayton TO, Robertson C, the ISAAC Phase Three Study Group. Global analysis of breast feeding and risk of symptoms of asthma, rhinoconjunctivitis and eczema in 6-7 year old children: ISAAC Phase Three. *Allergol Immunopathol (Madr)*. 2011; 39(6):318-325.
13. Boyle RJ, Ismail IH, Kivivuori S, et al. Lactobacillus GG treatment during pregnancy for the prevention of eczema: a randomized controlled. trial. *Allergy*. 2011; 66:509–516.
14. Brew BK, Kull I, Garden F, Almqvist C, Bergström A, Lind T, Webb K, Wickman M, Marks GB. Breastfeeding, asthma, and allergy: a tale of two cities. *Pediatr Allergy Immunol*. 2012; 23(1):75-82. doi: 10.1111/j.1399-3038.2011.01229.x.
15. Carlsten C, Dimich-Ward H, Ferguson A, Watson W, Rousseau R, DyBuncio A, Becker A, and Chan-Yeung M. Atopic dermatitis in a high-risk cohort: natural history, associated allergic outcomes, and risk factors. *Ann Allergy Asthma Immunol* 2013; 110:24e28.
16. Carlsten C, Dimich-Ward H, DyBuncio A, Becker AB and Chan-Yeung M. Cotinine versus questionnaire: early-life environmental tobacco smoke exposure and incident asthma. *BMC Pediatrics* 2012; 12:187.
17. Carlsten C, Dybuncio A, Becker A, Chan-Yeung M, Brauer M. Traffic-related air pollution and incident asthma in a high-risk birth cohort. *Occup Environ Med* 2011; 68:291e295. doi:10.1136/oem.2010.055152.
18. Carlsten C, Ferguson A, Dimich-Ward H, Chan H, DyBuncio A, Rousseau R, Becker A, Chan-Yeung M. Association between endotoxin and mite allergen exposure with asthma and specific sensitization at age 7 years in high-risk children. *Pediatr Allergy Immunol* 2011; 22: 320–326.
19. Chatzi L, Garcia R, Roumeliotaki T, Basterrechea M, Begiristain H, Iñiguez C, Vioque J, Kogevinas M, Sunyer J. Mediterranean diet adherence during pregnancy and risk of wheeze and eczema in the first year of life: INMA (Spain) and RHEA (Greece) mother-child cohort studies. *Br J Nutr*. 2013; 17:1-11.
20. Chen YC, Dong GH, Lin KC and Lee YL. Gender difference of childhood overweight and obesity in predicting the risk of incident asthma: a systematic review and meta-analysis. *obesity reviews* 2013; 14:222–231.
21. Chen YC, Tsai CH, Lee YL. Early-life indoor environmental exposures increase the risk of childhood asthma. *Int J Hyg Environ Health* 2011; 215:19–25.
22. Cho Clara E, Norman M. Cesarean section and development of the immune system in the offspring. *American Journal of Obstetrics & Gynecology* 2013; 249-254.
23. Chu YT, Chen WY, Wang TN, Tseng HI, Wu JR, Ko YC. Extreme BMI predicts higher asthma prevalence and is associated with lung function impairment in school-aged children. *Pediatr Pulmonol* 2009; 44: 472–479.

24. de Marco R, Pesce G, Girardi P, Marchetti P, Rava M, Ricci P, Marcon A. Foetal exposure to maternal stressful events increases the risk of having asthma and atopic diseases in childhood. *Pediatr Allergy Immunol* 2012; 1-6.
25. Doege K, Grajecki D, Zyriax BC, Detinkina E, Zu Eulenburg C, Buhling KJ. Impact of maternal supplementation with probiotics during pregnancy on atopic eczema in childhood-a meta-analysis. *Br J Nutr.* 2012; 107:1– 6.
26. Dotterud CK, Storrø O, Simpson MR, Johnsen R and Øien T. The impact of pre- and postnatal exposures on allergy related diseases in childhood: a controlled multicentre intervention study in primary health care. *BMC Public Health* 2013; 13:123.
27. Dotterud CK, Storrø O, Johnsen R and Øien T. Probiotics in pregnant women to prevent allergic disease: a randomized, double-blind trial. *British Journal of Dermatology* 2010; 163:616–623.
28. D'Vaz N, Meldrum SJ, Dunstan JA, Lee-Pullen TF, Metcalfe J, Holt BJ, Serralha M, Tulic MK, Mori TA and Prescott SL. Fish oil supplementation in early infancy modulates developing infant immune responses. *Clinical & Experimental Allergy* 2012; 42:1206–1216.
29. Ege MJ, Mayer M, Normand A-C, Genuneit J, Cookson W, Braun-Fahrländer C, Heederik D, Piarroux R, von Mutius E, for the GABRIELA Transregio 22 Study group. Exposure to environmental microorganisms and childhood asthma. *N Engl J Med* 2011; 364:701-9.
30. Ellwood P, Asher MI, García-Marcos L, Williams H, Keil U, Robertson C, Nagel G; ISAAC Phase III Study Group. Do fast foods cause asthma, rhinoconjunctivitis and eczema? Global findings from the International Study of Asthma and Allergies in Childhood (ISAAC) phase three. *Thorax* 2013; 68(4):351-60. doi: 10.1136/thoraxjnl-2012-202285.
31. Emmanouil E, Manios Y, Grammatikaki E, Kondaki K, Oikonomou E, Papadopoulou N, Vassilopoulou E. Association of nutrient intake and wheeze or asthma in a Greek pre-school population. *Pediatr Allergy Immunol* 2010; 21(1 Pt 1):90-5. DOI: 10.1111/j.1399-3038.2009.00876.x.
32. Epstein TG, Bernstein DI, Levin L, Khurana Hershey GK, Ryan PH, Reponen T, Villareal M, Lockey JE, and LeMasters GK. Opposing Effects of Cat and Dog Ownership and Allergic Sensitization on Eczema in an Atopic Birth Cohort. *J Pediatr* 2011; 158:265-71.
33. Eriksson J, Ekerljung L, Lötvall J, Pullerits T, Wennergren G, Rönmark E, Torén K, Lundbäck B. Growing up on a farm leads to lifelong protection against allergic rhinitis. *Allergy* 2010; 65(11):1397-403. doi: 10.1111/j.1398-9995.2010.02397.x.
34. Erkkola M, Kaila M, Nwaru BI, Kronberg-Kippila C, Ahonen S, Nevalainen J, et al. Maternal vitamin D intake during pregnancy is inversely associated with asthma and allergic rhinitis in 5-year-old children. *Clin Exp Allergy* 2009; 39: 875-82.
35. Flohr C, Nagel G, Weinmayr G, Kleiner A, Williams HC, Al't-Khaled N, Strachan DP, the ISAAC Phase Two Study Group. Tuberculosis, bacillus Calmette–Gue´rin vaccination, and allergic disease: Findings from the International Study of Asthma and Allergies in Childhood Phase Two. *Pediatr Allergy Immunol* 2012; 23: 324–331.
36. Flohr C, Nagel G, Weinmayr G, Kleiner A, Strachan DP, Williams HC. ISAAC Phase Two Study Group. Lack of evidence for a protective effect of prolonged breastfeeding on childhood eczema: lessons from the International Study of Asthma and Allergies in Childhood (ISAAC) Phase Two. *Br J Dermatol* 2011; 165(6):1280-9. doi: 10.1111/j.1365-2133.2011.10588.x.

37. Foliaki S, Pearce N, Björkstén B, Mallol J, Montefort S, von Mutius E. International Study of Asthma and Allergies in Childhood Phase III Study Group. Antibiotic use in infancy and symptoms of asthma, rhinoconjunctivitis, and eczema in children 6 and 7 years old: International Study of Asthma and Allergies in Childhood Phase III. *J Allergy Clin Immunol* 2009; 124(5):982-9. doi: 10.1016/j.jaci.2009.08.017.
38. Furuhejm C, Warstedt K, Larsson J, Fredriksson M, Bottcher MF, Falth-Magnusson K, et al: Fish oil supplementation in pregnancy and lactation may decrease the risk of infant allergy. *Acta Paediatr* 2009; 98:1461–1467.
39. Furuhejm C, Warstedt K, Fagerås M, Fälth-Magnusson K, Larsson J, Fredriksson M, Duchén K. Allergic disease in infants up to 2 years of age in relation to plasma omega-3 fatty acids and maternal fish oil supplementation in pregnancy and lactation. *Pediatr Allergy Immunol* 2011; 22(5):505-14. doi: 10.1111/j.1399-3038.2010.01096.x.
40. Garcia-Marcos L, Castro-Rodriguez JA, Weinmayr G, Panagiotakos DB, Priftis KN, Nagel G. Influence of Mediterranean diet on asthma in children: A systematic review and meta-analysis. *Pediatr Allergy Immunol* 2013; 1-9.
41. Garcia-Marcos L, González-Díaz C, Garvajal-Uruena I, Pac-Sa MR, Busquets-Monge RM, Suárez-Varela MM, Batlles-Garrido J, Blanco-Quirós A, Varela ALS, García-Hernández G, Aguinaga-Ontoso I. Early exposure to paracetamol or to antibiotics and eczema at school age: Modification by asthma and rhinoconjunctivitis. *Pediatr Allergy Immunol* 2010; 1-7 DOI: 10.1111/j.1399-3038.2010.01037.x.
42. Gehring U, de Jongste JC, Kerkhof M, Oldewening M, Postma D, van Strien RT, Wijga AH, Willers SM, Wolse A, Gerritsen J, Smit HA & Brunekreef B. The 8-year follow-up of the PIAMA intervention study assessing the effect of mite-impermeable mattress covers. *Allergy* 2012; 67:248–256.
43. Genuneit J. Exposure to farming environments in childhood and asthma and wheeze in rural populations: a systematic review with metaanalysis. *Pediatr Allergy Immunol* 2012; 23:509–518.
44. Giwercman C, Halkjaer LB, Jensen SM, Bønnelykke K, Lauritzen L, Bisgaard H. Increased risk of eczema but reduced risk of early wheezy disorder from exclusive breast-feeding in high-risk infants. *J Allergy Clin Immunol* 2010; 125(4):866-71. doi: 10.1016/j.jaci.2010.01.026.
45. Goksör E, Alm B, Pettersson R, Möllborg P, Erdes L, Aberg N, Wennergren G. Early fish introduction and neonatal antibiotics affect the risk of asthma into school age. *Pediatr Allergy Immunol* 2013; 1-6.
46. Grüber C, van Stuijvenberg M, Mosca F, et al. Reduced occurrence of early atopic dermatitis because of immunoactive prebiotics among low-atopy-risk infants. *J Allergy Clin Immunol* 2010; 126:791–797.
47. Guxens M, Sonnenschein-van der Voort AMM, Tiemeier H, Hofman A, Sunyer J, de Jongste JC, Jaddoe VWV, Duijts L. Parental psychological distress during pregnancy and wheezing in preschool children: The Generation R Study. *Allergy Clin Immunol* 2014; 133:59-67.
48. Hägerhed-Engman L, Sigsgaard T, Samuelson I, Sundell J, Janson S, et al. Low home ventilation rate in combination with moldy odor from the building structure increase the risk for allergic symptoms in children. *Indoor Air* 2009; 19: 184–192.

49. Heimbeck I, Wjst M, Apfelbacher CJ. Low vitamin D serum level is inversely associated with eczema in children and adolescents in Germany. *Allergy* 2013; 68(7):906-10. doi: 10.1111/all.12167.
50. Hooper R, Heinrich J, Omenaas E, Sausenthaler S, Garcia-Larsen V, Bakolis I, Burney P. Dietary patterns and risk of asthma: results from three countries in European Community Respiratory Health Survey-II. *British Journal of Nutrition* 2010; 103:1354–1365. doi:10.1017/S0007114509993266.
51. Hughes AM, Lucas RM, Ponsonby A-L, Chapman C, Coulthard A, Dear K, Dwyer T, Kilpatrick TJ, McMichael AJ, Pender MP, Taylor BV, Valery P, van der Mei IAF & Williams D. The role of latitude, ultraviolet radiation exposure and vitamin D in childhood asthma and hayfever: an Australian multicenter study. *Pediatr Allergy Immunol* 2011; 22:327–333.
52. Illi S, Depner M, Genuneit J, Horak E, Loss G, Strunz-Lehner C, Büchele G, Boznanski A, Danielewicz H, Cullinan P, Heederik D, Braun-Fahrlander C, von Mutius E, and the GABRIELA Study Group. Protection from childhood asthma and allergy in Alpine farm environments—the GABRIEL Advanced Studies. *J Allergy Clin Immunol* 2012; 129:1470-7.
53. Jaakkola JJ, Hwang BF, Jaakkola MS. Home dampness and molds as determinants of allergic rhinitis in childhood: a 6-year, population-based cohort study. *Am J Epidemiol* 2010; 172(4):451-9. doi: 10.1093/aje/kwq110. Epub 2010 Jul 16.
54. Källén B, Finnström O, Nygren K-G, Otterblad Olausson P. Maternal drug use during pregnancy and asthma risk among children. *Pediatr Allergy Immunol* 2013; 24:28–32.
55. Kang EM, Lundsberg LS, Illuzzi JL, Bracken MB. Prenatal exposure to acetaminophen and asthma in children. *Obstet Gynecol* 2009; 114:1295–306.
56. Karvonen AM, Hyvärinen A, Gehring U, Korppi M, Doekes G, Riedler J, Braun-Fahrlander C, Bitter S, Schmid S, Keski-Nisula L, Roponen M, Kaulek V, Dalphin JC, Pfefferle PI, Renz H, Büchele G, von Mutius E, Pekkanen J; PASTURE Study Group. Exposure to microbial agents in house dust and wheezing, atopic dermatitis and atopic sensitization in early childhood: a birth cohort study in rural areas. *Clin Exp Allergy* 2012; 42(8):1246-56. doi: 10.1111/j.1365-2222.2012.04002.x.
57. Karvonen AM, Hyvärinen A, Roponen M, Hoffmann M, Korppi M, Remes S, von Mutius E, Nevalainen A, Pekkanen J. Confirmed Moisture Damage at Home, Respiratory Symptoms and Atopy in Early Life: A Birth-Cohort Study *Pediatrics* 2009; 124:e329.
58. Kasznia-Kocot J, Kowalska M, Gorny RL, Niesler A, Wypych-Ślusarska A. Environmental risk factors for respiratory symptoms and childhood asthma. *Ann. Agric. Environ. Med.* 2010; 17:221–229.
59. Keil T, Lau S, Roll S, Grüber C, Nickel R, Niggemann B, Wahn U, Willich SN, Kulig M. Maternal smoking increases risk of allergic sensitization and wheezing only in children with allergic predisposition: longitudinal analysis from birth to 10 years. *Allergy* 2009; 64(3):445-51. doi: 10.1111/j.1398-9995.2008.01867.x.
60. Kim JY, Kwon JH, Ahn SH, et al. Effect of probiotic mix (*Bifidobacterium bifidum*, *Bifidobacterium lactis*, *Lactobacillus acidophilus*) in the primary prevention of eczema: a double-blind, randomized, placebocontrolled trial. *Pediatr Allergy Immunol* 2009; 21:e386–e393.

61. Kramer M.S. "Breast is best": The evidence. *Early Human Development* 2010; 86:729–732.
62. Kuitunen M, Kukkonen K, Juntunen-Backman K, Korpela R, Poussa T, Tuure T, Haahtela T, Savilahti E. Probiotics prevent IgE-associated allergy until age 5 years in cesarean-delivered children but not in the total cohort. *J Allergy Clin Immunol* 2009; 123:335-41.
63. Kuitunen M, Kukkonen AK, Savilahti E. Impact of maternal allergy and use of probiotics during pregnancy on breast milk cytokines and food antibodies and development of allergy in children until 5 years. *Int Arch Allergy Immunol* 2012; 159(2):162-70. doi: 10.1159/000336157.
64. Kukkonen K, Kuitunen M, Haahtela T, Korpela R, Poussa T, Savilahti E. High intestinal IgA associates with reduced risk of IgE-associated allergic diseases. *Pediatr Allergy Immunol* 2009; 1-7. DOI: 10.1111/j.1399-3038.2009.00907.x.
65. Kull I, Melen E, Alm J, Hallberg J, Svartengren M, van Hage M, Pershagen G, Wickman M, Bergström A. Breast-feeding in relation to asthma, lung function, and sensitization in young schoolchildren. *J Allergy Clin Immunol* 2010; 125(5):1013-9. doi: 10.1016/j.jaci.2010.01.051.
66. Kuo HC, Liu CA, Ou CY, Hsu TY, Wang CL, Huang HC, Chuang H, Liang HM, Yang KD. Partial protein-hydrolyzed infant formula decreased food sensitization but not allergic diseases in a prospective birth cohort study. *Int Arch Allergy Immunol* 2011; 154(4):310-7. doi: 10.1159/000321823.
67. Kusunoki T, Morimoto T, Nishikomori R, Yasumi T, Heike T, Mukaida K, Fujii T, Nakahata T. Breastfeeding and the prevalence of allergic diseases in schoolchildren: Does reverse causation matter? *Pediatr Allergy Immunol* 2010; 21:60–66 DOI: 10.1111/j.1399-3038.2009.00982.x.
68. Lampi J, Canoy D, Jarvis D, et al. Farming environment and prevalence of atopy at age 31: prospective birth cohort study in Finland. *Clin Exp Allergy* 2011; 41:987–93.
69. Lau S, Gerhold K, Zimmermann K, Ockeloen CW, Rossberg S, Wagner P, Sulser C, Bunikowski R, Witt I, Wauer J, Beschorner J, Menke G, Hamelmann E, Wahn U. Oral application of bacterial lysate in infancy decreases the risk of atopic dermatitis in children with 1 atopic parent in a randomized, placebo-controlled trial. *J Allergy Clin Immunol* 2012; 129(4):1040-7. doi: 10.1016/j.jaci.2012.02.005.
70. Li J, Xun P, Zamora D, Sood A, Liu K, Daviglus M, Iribarren C, Jacobs Jr D, Shikany JM, and He K. Intakes of long-chain omega-3 (n23) PUFAs and fish in relation to incidence of asthma among American young adults: the CARDIA study. *Am J Clin Nutr* 2013; 97:173–8.
71. Linnamaa P, Savolainen J, Koulu L, Tuomasjukka S, Kallio H, Yang B, Vahlberg T and Tahvonen R. Blackcurrant seed oil for prevention of atopic dermatitis in newborns: a randomized, double-blind, placebo-controlled trial. *Clinical & Experimental Allergy* 2010; 40:1247–1255.
72. Lodge CJ, Lowe AJ, Gurrin LC, Matheson MC, Balloch A, Axelrad C, Hill DJ, Hosking CS, Rodrigues S, Svanes C, Abramson MJ, Allen KJ, Dharmage SC. Pets at birth do not increase allergic disease in at-risk children. *Clinical & Experimental Allergy* 2012; 42:1377–1385.
73. Lodinová-Zádníková R, Prokesová L, Kocourková I, Hrdý J, Zizka J. Prevention of allergy in infants of allergic mothers by probiotic *Escherichia coli*. *Int Arch Allergy Immunol* 2010; 153:201-6.

74. Lødrup Carlsen KC, Roll S, Carlsen K-H, Mowinckel P, Wijga AH, Brunekreef B, Torrent M, Roberts G, Arshad SH, Kull I, Krämer U, von Berg A, Eller E, Høst A, Kuehni C, Spycher B, Sunyer J, Chen C-M, Reich A, Asarnej A, Puig C, Herbarth O, John JMM, Van Stehen K, Willich SN, Wahn U, Lau S, Keil T, as part of the GA2LEN WP 1.5 'Birth Cohorts' working group. Does Pet Ownership in Infancy Lead to Asthma or Allergy at School Age? Pooled Analysis of individual Participant Data from 11 European Birth Cohorts. *Plos* 2012; 7(8):1-12.
75. Lombardi E, Simoni M, La Grutta S, Viegi G, Bisanti L, Chellini E, Dell Orco V, Migliore E, Petronio MG, Pistelli R, Rusconi F, Sestini P, Forastiere F, Galassi C and the SIDRIA-2 Collaborative Group. Effects of pet exposure in the first year of life on respiratory and allergic symptoms in 7-yr-old children. The SIDRIA-2 study. *Pediatr Allergy Immunol* 2010; 21:268–276.
76. Loss G, Apprigh S, Waser M, et al. The protective effect of farm milk consumption on childhood asthma and atopy: The GABRIELA study. *J Allergy Clin Immunol* 2011; 128:766–773.e4.
77. Lowe AJ, Hosking CS, Bennett CM, Allen KJ, Axelrad C, Carlin JB, Abramson MJ, Dharmage SC, and Hill DJ. Effect of a partially hydrolyzed whey infant formula at weaning on risk of allergic disease in high-risk children: A randomized controlled trial. *J Allergy Clin Immunol* 2011; 128:360-5.
78. Lowe AJ, Carlin JB, Bennett CM, Hosking CS, Allen KJ, Robertson CF, Axelrad C, Abramson MJ, Hill DJ, Dharmage SC. Paracetamol use in early life and asthma: prospective birth cohort study. *BMJ* 2010; 341:c4616. doi: 10.1136/bmj.c4616.
79. Lumia M, Luukkainen P, Kaila M, Tapanainen H, Takkinen HM, Prasad M, Niinistö S, Nwaru BI, Kenward MG, Ilonen J, Simell O, Knip M, Veijola R, Virtanen SM. Maternal dietary fat and fatty acid intake during lactation and the risk of asthma in the offspring. *Acta Paediatr* 2012; 101(8):e337-43. doi: 10.1111/j.1651-2227.2012.02718.x.
80. Maas T, Dompeling E, Muris JWM, Wesseling G, Knottnerus JA & van Schayck OCP. Prevention of asthma in genetically susceptible children: A multifaceted intervention trial focussed on feasibility in general practice. *Pediatric Allergy and Immunology* 2011; 22:794–802.
81. Macsali F, Real FG, Omenaas ER, Bjorge L, Janson C, Franklin K, Svanes C. Oral contraception, body mass index, and asthma: a cross-sectional Nordic-Baltic population survey. *J Allergy Clin Immunol* 2009; 123(2):391-7. doi: 10.1016/j.jaci.2008.10.041.
82. Magnus Maria C, et al. Decline in early childhood respiratory tract infections in the Norwegian mother and child cohort study after introduction of pneumococcal conjugate vaccination. *Pediatr Infect Dis J* 2012; 31(9):951-5.
83. Mai XM, Langhammer A, Camargo CA Jr, Chen Y. Serum 25-hydroxyvitamin D levels and incident asthma in adults: the HUNT Study. *Am J Epidemiol* 2012; 176(12):1169-76. doi: 10.1093/aje/kws235.
84. Mai XM, Becker AB, Liem JJ, Kozyrskyj AL. Fast food consumption counters the protective effect of breastfeeding on asthma in children? *Clin & Exp Allergy* 2009; (39): 556-561.
85. Marmstö K, Rosenlund H, Kull I, Håkansson N, Wickman M, Pershagen G, Berström A. Use of multivitamin supplements in relation to allergic disease in 8-y-old children. *Am J Clin Nutr* 2009; 1-6.

86. Maslova E, Granström C, Hansen S, Petersen SB, Strøm M, Willett WC, Olsen SF. Peanut and tree nut consumption during pregnancy and allergic disease in children—should mothers decrease their intake? Longitudinal evidence from the Danish National Birth Cohort. *J Allergy Clin Immunol* 2012; 130:724-32.
87. Maslova E, Halldorsson TI, Strøm M, Olsen SF. Low-fat yoghurt intake in pregnancy associated with increased child asthma and allergic rhinitis risk: a prospective cohort study. *Journal of Nutritional Science* 2012; (1): e5,1- 11.
88. Migliore E, Berti G, Galassi C, Pearce N, Forastiere F, Calabrese R, Armenio L, Biggeri A, Bisanti L, Bugiani M, Cadum E, Chellini E, Dell'orco V, Giannella G, Sestini P, Corbo G, Pistelli R, Viegi G, Ciccone G; SIDRIA-2 Collaborative Group. Respiratory symptoms in children living near busy roads and their relationship to vehicular traffic: results of an Italian multicenter study (SIDRIA 2). *Environ Health* 2009; 8:27. doi: 10.1186/1476-069X-8-27.
89. Mitchell EA, Beasley R, Keil U, Montefort S, Odhiambo J. ISAAC Phase Three Study Group. The association between tobacco and the risk of asthma, rhinoconjunctivitis and eczema in children and adolescents: analyses from Phase Three of the ISAAC programme. *Thorax* 2012; 67(11):941-9. doi: 10.1136/thoraxjnl-2011-200901.
90. Miyake Y, Sasaki S, Tanaka K, Hirota Y. Consumption of vegetables, fruit, and antioxidants during pregnancy and wheeze and eczema in infants. *Allergy* 2010; 65: 758-65.
91. Miyake Y, Sasaki S, Tanaka K, Hirota Y. Dairy food, calcium and vitamin D intake in pregnancy, and wheeze and eczema in infants. *Eur Respir J* 2010; 35:1228–1234.
92. Miyake Y, Tanaka K, Okubo H, Sasaki S, Arakawa M. Dairy food, calcium and vitamin D intake and prevalence of allergic disorders in pregnant Japanese women. *INT J TUBERC LUNG DIS* 2012; 16(2):255–261.
93. Miyake Y, Sasaki S, Tanaka K, Ohfuji S, Hirota Y. Maternal fat consumption during pregnancy and risk of wheeze and eczema in Japanese infants aged 16–24 months: the Osaka Maternal and Child Health Study. *Thorax* 2009; 64:815–821. doi:10.1136/thx.2009.115931.
94. Morales E, Romieu I, Guerra S, Ballester F, Rebagliato M, Viogue J, Tardon A, Rodriguez Delhi C, Arranz L, Torrent M, et al. Maternal vitamin D status in pregnancy and risk of lower respiratory tract infections, wheezing, and asthma in offspring. *Epidemiology* 2012; 23:64–71.
95. Morales E, García-Esteban R, Guxens M, Guerra S, Mendez M, Moltó-Puigmartí C, Lopez-Sabater MC, Sunyer J. Effects of prolonged breastfeeding and colostrum fatty acids on allergic manifestations and infections in infancy. *Clin Exp Allergy* 2012; 42(6):918-28. doi: 10.1111/j.1365-2222.2012.03969.x.
96. Mpairwe H, Webb EL, Muhangi L, et al. Anthelmintic treatment during pregnancy is associated with increased risk of infantile eczema: randomised- controlled trial results. *Pediatr Allergy Immunol* 2011; 22:305– 312.
97. Murray CS, Canoy D, Buchan I, Woodstock A, Simpson A, Custovic A. Body mass index in young children and allergic disease: gender differences in a longitudinal study. *Clin Exp Allergy* 2010; 1-8.
98. Osman MF, Black C, Jick S and Hannaford P. Previous maternal oral contraception and the risk among subsequent offspring of asthma diagnosis in early childhood. *Paediatric and Perinatal Epidemiology* 2009; 23:567–573.

99. Nagel G, Weinmayr G, Flohr C, Kleiner A, Strachan DP. Association of pertussis and measles infections and immunizations with asthma and allergic sensitization in ISAAC Phase Two. *Pediatr Allergy Immunol* 2012; 23: 736–745.
100. Nagel G, Weinmayr G, Kleiner A, Garcia-Marcos L, Strachan DP, the ISAAC Phase Two Study Group. Effect of diet on asthma and allergic sensitisation in the International Study on Allergies and Asthma in Childhood (ISAAC) Phase Two. *Thorax* 2010; 65:516e522. doi:10.1136/thx.2009.128256
101. Niers L, Martn R, Rijkers G, Sengers F, Timmerman H, van Uden N, Smidt H, Kimpen J, Hoekstra M. The effects of selected probiotic strains on the development of eczema (the PandA study). *Allergy* 2009; 64:1349–1358.
102. Noakes PS, Vlachava M, Kremmyda L-S, Diaper ND, Miles EA, Erlewyn-Lajeunesse M, Williams AP, Godfrey KM, and Calder PC. Increased intake of oily fish in pregnancy: effects on neonatal immune responses and on clinical outcomes in infants at 6 mo. *Am J Clin Nutr* 2012; 95:395–404.
103. Notenbloom ML, Mommers M, Jansen EHJM, Penders J, Thijs C. Maternal fatty acid status in pregnancy and childhood atopic manifestations: KOALA birth cohort study. *Clin Exp Allergy* 2010; 1-10.
104. Nwaru BI, Craig LCA, Allan K, Prabhu N, Turner SW, McNeill G, Erkkola M, Seaton A, Devereux G. Breastfeeding and introduction of complementary foods during infancy in relation to the risk of asthma and atopic diseases up to 10 years. doi: 10.1111/cea.12180.
105. Nwaru, BI et al. Timing of infant feeding in relation to childhood asthma and allergic diseases. *J Allergy Clin Immunol* 2013; 131(1):78-86. doi: 10.1016/j.jaci.2012.10.028.
106. Nwaru BI, Erkkola M, Lumia M, Kronberg-Kippilä C, Ahonen S, Kaila M, Ilonen J, Simell O, Knip M, Veijola R, Virtanen SM. Maternal intake of fatty acids during pregnancy and allergies in the offspring. *British Journal of Nutrition* 2012; 108:720-732 doi:10.1017/S0007114511005940.
107. Oh SY, Chung J, Kim MK, Kwon SO, Cho BH. Antioxidant nutrient intakes and corresponding biomarkers associated with the risk of atopic dermatitis in young children. *Eur J Clin Nutr* 2010; 64:245–252.
108. Oien T, Storro O, Johnsen R. Do early intake of fish and fish oil protect against eczema and doctor-diagnosed asthma at 2 years of age? A cohort study. *J Epidemiol Community Health* 2010; 64:124–129.
109. Omland O, Hjort C, Pedersen OF, Miller MR, Sigsgaard T. New-onset asthma and the effect of environment and occupation among farming and nonfarming rural subjects. *J Allergy Clin Immunol* 2011; 128:761–5.
110. Osborn DA, Sinn JK. Probiotics in infants for prevention of allergy. *Cochrane Database Syst Rev* 2013; 3:CD006474. doi: 10.1002/14651858.CD006474.
111. Ou C-Y, Kuo H-C, Wang L, Hsu T-Y, Chuang H, Liu C-A, Chang J-C, Yu H-R and Yang KD. Prenatal and postnatal probiotics reduces maternal but not childhood allergic diseases: a randomized, double-blind, placebo-controlled trial. *Clinical & Experimental Allergy* 2012; 42:1386–1396.

112. Palmer DJ, Sullivan T, Gold MS, Prescott SL, Heddle R, Gibson RA, Makrides M. Randomized controlled trial of fish oil supplementation in pregnancy on childhood allergies. *Allergy* 2013; DOI: 10.1111/all.12233.
113. Palmer DJ, Sullivan T, Gold MS, Prescott SL, Heddle R, Gibson RA, Makrides M. Effect of n-3 long chain polyunsaturated fatty acid supplementation in pregnancy on infants' allergies in first year of life: randomised controlled trial. *BMJ* 2012; 344:e184. doi: 10.1136/bmj.e184.
114. Papoutsakis C, Priftis KN, Drakouli M, Prifti S, Konstantaki E, Chondronikola M, Antonogeorgos G, Matziou V. Childhood overweight/obesity and asthma: is there a link? A systematic review of recent epidemiologic evidence. *J Acad Nutr Diet* 2013; 113(1):77-105. doi: 10.1016/j.jand.2012.08.025.
115. Patelarou E, Giourgouli G, Lykeridou A, Vrioni E, Fotos N, Siamaga E, Vivilaki V, Brokalaki H. Association between biomarker-quantified antioxidant status during pregnancy and infancy and allergic disease during early childhood: A systematic review. *Nutrition Reviews* 2011; 69(11):627–641.
116. Pelucchi C, Chatenoud L, Turati F, Galeone C, Moja L, Bach JF, La Vecchia C. Probiotics supplementation during pregnancy or infancy for the prevention of atopic dermatitis: a meta-analysis. *Epidemiology* 2012; 23(3):402-14. doi: 10.1097/EDE.0b013e31824d5da2.
117. Pelucchi C, Galeone C, Bach JF, La Vecchia C, Chatenoud L. Pet exposure and risk of atopic dermatitis at the pediatric age: A meta-analysis of birth cohort studies ScD et al. *JACI* 2013; 132:616-22.
118. Penders J, Kummeling I, and Thijs C. Infant antibiotic use and wheeze and asthma risk: a systematic review and meta-analysis. *Eur Respir J* 2011; 38(2):295-302. doi: 10.1183/09031936.00105010.
119. Pohlabeln H, Mühlenbruch K, Jacobs S, Böhmann H. Frequency of Allergic Diseases in 2-Year-Old Children in Relationship to Parental History of Allergy and Breastfeeding. *J Investig Allergol Clin Immunol* 2010; 20(3):195-200.
120. Pyrhönen K, Näyhä S, Hiltunen L, Läärä E. Caesarean section and allergic manifestations: insufficient evidence of association found in population-based study of children aged 1 to 4 years. *Acta Pædiatrica* 2013; 102:982–989.
121. Quansah R, Jaakkola MS, Hugg TT, Heikkinen SAM, Jaakkola JJK. Residential Dampness and Molds and the Risk of Developing Asthma: A Systematic Review and Meta-Analysis. *PLoS ONE* 2012; 7(11):e47526. doi:10.1371/journal.pone.0047526.
122. Rautava S, Kainonen E, Salminen S, Isolauri E. Maternal probiotic supplementation during pregnancy and breast-feeding reduces the risk of eczema in the infant. *J Allergy Clin Immunol* 2012; 130(6):1355-60. doi: 10.1016/j.jaci.2012.09.003.
123. Rebordosa C, Kogevinas M, Sørensen HT, Olsen J. Pre-natal exposure to paracetamol and risk of wheezing and asthma in children: A birth cohort study. *Int J Epidemiol* 2008; 37:583–590. doi:10.1093/ije/dyn070
124. Reponen T, Vesper S, Levin L, Johansson E, Ryan P, et al. High environmental relative moldiness index during infancy as a predictor of asthma at 7 years of age. *Ann Allergy Asthma Immunol* 2011; 107:120–126.

125. Risnen KR, Belanger K, Murk W, Bracken MB. Antibiotic Exposure by 6 Months and Asthma and Allergy at 6 Years: Findings in a Cohort of 1,401 US Children. *Am J Epidemiol* 2011; 173:310–318.
126. Roduit C, Wohlgensinger J, Frei R, Bitter S, Bieli C, Loeliger S, Büchele G, Riedler J, Dalphin JC, Remes S, Roponen M, Pekkanen J, Kabesch M, Schaub B, von Mutius E, Braun-Fahrländer C, Lauener R; PASTURE Study Group. Prenatal animal contact and gene expression of innate immunity receptors at birth are associated with atopic dermatitis. *J Allergy Clin Immunol* 2011; 127(1):179-85, 185.e1. Epub 2010 Nov 26.
127. Roduit C, Scholtens S, de Jongste JC, Wijga AH, Gerritsen J, Postma DS, Brunekreef B, Hoekstra MO, Aalberse R, Smit HA. Asthma at 8 years of age in children born by caesarean section. *Thorax* 2009; 64:107–113. doi:10.1136/thx.2008.100875 107.
128. Rosenlund H, Magnusson J, Kull I, Ha°kansson N, Wolk A, Pershagen G, Wickman M, Bergström M. Antioxidant intake and allergic disease in children. *Clinical & Experimental Allergy* 2012; (42):1491–1500.
129. Rzehak P, Wijga AH, Keil T, Eller E, Bindselev-Jensen C, Smit HA, Weyler J, Dom S, Sunyer J, Mendez M, Torrent M, Vall O, Bauer CP, Berdel D, Schaaf B, Chen CM, Bergström A, Fantini MP, Mommers M, Wahn U, Lau S, Heinrich J; GA<sup>2</sup>LEN-WP 1.5 Birth Cohorts. Body mass index trajectory classes and incident asthma in childhood: results from 8 European Birth Cohorts--a Global Allergy and Asthma European Network initiative. *J Allergy Clin Immunol* 2013; 131(6):1528-36. doi: 10.1016/j.jaci.2013.01.001.
130. Saadeh D, Salameh P, Baldi I, Raheison C. Diet and Diseases among population ages 0-18 years: myth or reality? *Nutrients* 2013; 5:3399-3423.
131. Sariachvili M, Droste J, Dom S, Wieringa M, Hagendorens M, Stevens W, van Sprundel M, Desager K, Weyler J. Early exposure to solid foods and the development of eczema in children up to 4 years of age. *Pediatr Allergy Immunol* 2010; 21(1 Pt 1):74-81. doi: 10.1111/j.1399-3038.2009.00899.x.
132. Sausenthaler S, Heinrich J, Koletzko S for the GINIplus and LISApplus Study Groups. Early diet and the risk of allergy: what can we learn from the prospective birth cohort studies GINIplus and LISApplus? *Am J Clin Nutr* 2011; 94(suppl):2012S–7S.
133. Scott M, Roberts G, Kurukulaaratchy RJ, Matthews S, Nove A, Arshad SH. Multifaceted allergen avoidance during infancy reduces asthma during childhood with the effect persisting until age 18 years. *Thorax* 2012; 67(12):1046-51. doi: 10.1136/thoraxjnl-2012-202150.
134. Shaheen SO, Northstone K, Newson R, Emmett PM, Sheriff A, Henderson AJ. Dietary patterns in pregnancy and respiratory and atopic outcomes in childhood. *Thorax* 2009; 64:411-7.
135. Silverberg JI, Silverberg NB, Lee-Wong M. Association Between Atopic Dermatitis and Obesity in Adulthood. *Br J Dermatol* 2012; 166:498-504. Oct 16. doi: 10.1111/j.1365-2133.2011.10694.x.
136. Silverberg JI, Kleiman E, Lev-Tov H, Silverberg NB, Durkin HG, Joks R, Smith-Norowitz TA. Association between obesity and atopic dermatitis in childhood: a case-control study. *J Allergy Clin Immunol* 2011; 127(5):1180-6.e1. Epub 2011 Mar 16.

137. Silvers KM, Frampton CM, Wickens K, Pattermore PK, Ingham T, Fishwick D, Crane J, Town GI, Epton MJ; New Zealand Asthma and Allergy Cohort Study Group. Breastfeeding protects against current asthma up to 6 years of age. *J Pediatr* 2012; 160(6):991-6.e1. doi: 10.1016/j.jpeds.2011.11.055.
138. Soh SE, Aw M, Gerez I, Chongw YS, Rauffw M, Ngz JPM, Wong HB, Pai N, Lee BW and Shek L P-C. Probiotic supplementation in the first 6 months of life in at risk Asian infants – effects on eczema and atopic sensitization at the age of 1 year. *Clinical & Experimental Allergy* 2009; 39:571–578.
139. Song W-J, Kim S-H, Lim S, Park Y-J, Kim M-H, Lee S-M, Lee S-B, Kim K-W, Jang H-C, Cho S-H, Min K-U and Chang Y-S. Association between obesity and asthma in the elderly population: potential roles of abdominal subcutaneous adiposity and sarcopenia. *Ann Allergy Asthma Immunol* 2012; 109:243–248.
140. Sordillo J E et al. Multiple microbial exposures in the home may protect against asthma and allergy in childhood. *Clin Exp Allergy* 2010; 40(6):902-10. doi: 10.1111/j.1365-2222.2010.03509.x.
141. Sozańska B, Pearce N, Dudek K, Cullinan P. Consumption of unpasteurized milk and its effects on atopy and asthma in children and adult inhabitants in rural Poland. *Allergy* 2013; DOI: 10.1111/all.12147.
142. Steenhuis TJ, van Aalderen WMC, Bloksma N, Nijkamp FP, van der Laag J, van Loveren H, Rijkers GT, Kuis W, Hoekstra MO. Bacille-Calmette-Guerrin vaccination and the development of allergic disease in children: a randomized, prospective, single-blind study. *Clin Exp Allergy* 2008; 38:79-85.
143. Suárez-Varela MM, Alvarez LG, Kogan MD, Ferreira JC, Martínez Gimeno A, Aguinaga Ontoso I, González Díaz C, Arnedo Pena A, Domínguez Aurrecochea B, Busquets Monge RM, Blanco Quiros A, Batlles Garrido J, García de Andoain N, Varela AL, García Merino A, Gimeno Clemente N, Llopis González A. Diet and prevalence of atopic eczema in 6 to 7-year-old schoolchildren in Spain: ISAAC phase III. *J Investig Allergol Clin Immunol* 2010; 20(6):469-75.
144. Tanaka K, Miyake Y, Arakawa M, Sasaki S, Ohya Y. U-shaped association between body mass index and the prevalence of wheeze and asthma, but not eczema or rhinoconjunctivitis: The Ryukyus Child Health Study. *J Asthma* 2011; 48(8):804-810.
145. Thijs C, Müller A, Rist L, Kummeling I, Snijders BEP, Huber M, van Ree R, Simões-Wüst AP, Dagnelie PC, van den Brandt PA. Fatty acids in breast milk and development of atopic eczema and allergic sensitisation in infancy. *Allergy* 2010; DOI: 10.1111/j.1398-9995.2010.02445.x.
146. Tischer CG, Hohmann C, Thiering E, Herbarth O, Müller A, Henderson J, Granell R, Fantini MP, Luciano L, Bergström A, Kull I, Link E, von Berg A, Kuehni CE, Strippoli M-P F, Gehring U, Wijga A, Eller E, Bindeslev-Jensen C, Keil T, Heinrich J & as part of the ENRIECO consortium. Meta-analysis of mould and dampness exposure on asthma and allergy in eight European birth cohorts: an ENRIECO initiative. *Allergy* 2011; 66:1570–1579.
147. Tischer C, Chen CM, Heinrich J. Association between domestic mould and mould components, and asthma and allergy in children: a systematic review. *Eur Respir J* 2011; 38(4):812-24. doi: 10.1183/09031936.00184010.

148. Tsai HJ, Tsai AC. The association of BMI and sedentary time with respiratory symptoms and asthma in 5th grade schoolchildren in Kaohsiung, Taiwan. *J Asthma* 2009; 46(1):9-15.
149. Uddenfeldt M, Janson C, Lampa E, Leander M, Norbäck D, Larsson L, Rask-Andersen A. High BMI is related to higher incidence of asthma, while a fish and fruit diet is related to a lower - Results from a long-term follow-up study of three age groups in Sweden. *Respiratory Medicine* 2010; 104:972e980.
150. van Nimwegen FA, Penders J, Stobberingh EE, Postma DS, Koppelman GH, Kerkhof M, Reijmerink NE, Dompeling E, van den Brandt PA, Ferreira I, Mommers M, Thijs C. Mode and place of delivery, gastrointestinal microbiota, and their influence on asthma and atopy. *J Allergy Clin Immunol* 2011; 7:1-11.
151. Vargas C, Bustos P, Diaz PV, Amigo H, Rona RJ. Childhood environment and atopic conditions, with emphasis on asthma in a Chilean agricultural area. *J Asthma* 2008; 45:73-78
152. Varraso R, Oryszczyn MP, Mathieu N, et al. Farming in childhood, diet in adulthood and asthma history [Internet]. *Eur Respir J* 2011; <http://www.ncbi.nlm.nih.gov/pubmed/21659411>.
153. Vazquez-Nava F, Morales Romero J, Crodova Fernandez JA, et al. Association between obesity and asthma in preschool Mexican children. *Sci World J* 2010; 10:1339-1346.
154. Vicedo-Cabrera AM, García-Marcos L, Llopis-González A, López-Silvarrey-Varela Á, Miner-Canflanca I, Batlles-Garrido J, Blanco-Quiros A, Busquets-Monge RM, Díaz-Vazquez C, González-Díaz C, Martínez-Gimeno A, Guillén-Grima F, Arnedo-Pena A, Morales-Suárez-Varela M. Atopic dermatitis and indoor use of energy sources in cooking and heating appliances. *BMC Public Health* 2012; 12:890. doi: 10.1186/1471-2458-12-890.
155. Virtanen SM, Kaila M, Pekkanen J, Kenward MG, Uusitalo U, Pietinen P, Kronberg-Kippila C, Hakulinen T, Simell O, Ilonen J, Veijola R, Knip M. Early introduction of oats associated with decreased risk of persistent asthma and early introduction of fish with decreased risk of allergic rhinitis. *British Journal of Nutrition* 2010; 103:266–273.
156. Visness CM, London SJ, Daniels JL, Kaufman JS, Yeatts KB, Siega-Riz A-M, Liu AH, Calatroni A, Zeldin DC. Association of obesity with IgE levels and allergy symptoms in children and adolescents: Results from the National Health and Nutrition Examination Survey 2005-2006. *J Allergy Clin Immunol* 2009; 123:1163-9.
157. von Berg A, Filipiak-Pittroff B, Krämer U, Hoffmann B, Link E, Beckmann C, Hoffmann U, Reinhardt D, Gröbl A, Heinrich J, Wichmann HE, Bauer CP, Koletzko S, Berdel D; GINIplus study group. Allergies in high-risk schoolchildren after early intervention with cow's milk protein hydrolysates: 10-year results from the German Infant Nutritional Intervention (GINI) study. *J Allergy Clin Immunol* 2013; 131(6):1565-73. doi: 10.1016/j.jaci.2013.01.006.
158. v. Berg A, Krämer U, Link E, Bollrath C, Heinrich J, Brockow I, Koletzko S, Gröbl A, Filipiak-Pittroff B, Wichmann H-E, Bauer C-P, Reinhardt D, Berdel D and the GINIplus study group. Impact of early feeding on childhood eczema: development after nutritional intervention compared with the natural course – the GINIplus study up to the age of 6 years. *Clinical & Experimental Allergy* 2010; 40:627–636.
159. Wennergren G, Ekerljung L, Alm B, Eriksson J, Lötval J, Lundbäck B. Asthma in late adolescence – farm childhood is protective and the prevalence increase has leveled off. *Pediatr Allergy Immunol* 2010; 21:806–13.

160. West, C E et al. Probiotics in primary prevention of allergic disease - follow-up at 8-9 years of age. *Allergy* 2013; 68(8):1015-20. doi: 10.1111/all.12191.
161. West CE, Dunstan J, McCarthy S, Metcalfe J, D’Vaz N, Meldrum S, Oddy WH, Tulic MK and Prescott SL. Associations between Maternal Antioxidant Intakes in Pregnancy and Infant Allergic Outcomes. *Nutrients* 2012; 4:1747-1758. doi:10.3390/nu4111747.
162. West CE, Hammarström M-L and Hernell O. Probiotics during weaning reduce the incidence of eczema. *Pediatr Allergy Immunol* 2009; 20:430–437.
163. Whitrow MJ, Moore VM, Rumbold AR, Davies MJ. Effect of supplemental folic acid in pregnancy on childhood asthma: a prospective birth cohort study. *Am J Epidemiol* 2009; 170:1486–1493.
164. Wickens K, Black P, Stanley TV, Mitchell E, Barthow C, Fitzharris P, Purdie G, Crane J.A protective effect of *Lactobacillus rhamnosus* HN001 against eczema in the first 2 years of life persists to age 4 years. *Clin Exp Allergy* 2012; 42(7):1071-9. doi: 10.1111/j.1365-2222.2012.03975.x.
165. Zhang Z, Lai HJ, Roberg KA, et al. Early childhood weight status in relation to asthma development in high-risk children. *J Allergy Clin Immunol* 2010; 126(6):1157-1162.
